# Supplementary material for: Ginkgo Leaf Inspired Fabrication of Micro/Nanostructures and Demonstration of Flexible Enzyme-Free Glucose Sensors
Source: MDPI journal article supplement (doi:10.3390/s22197507), 2022-10-03
Supplement: s1 [file s1]

## Supporting Information

Article

# Ginkgo leaf inspired fabrication of micro/nanostructures and the demonstration of flexible enzyme-free glucose sensors

Shulan Jiang<sup>1\*</sup>, Yueqi Chen<sup>2</sup>, Yong Peng<sup>2</sup>

1 School of Mechanical Engineering and Electronic Information, China University of Geosciences (Wuhan), Wuhan 430074, China

2 Tribology Research Institute, School of Mechanical Engineering, Southwest Jiaotong University, Chengdu 610031, China

\* Correspondence: jiangshulan@cug.edu.cn

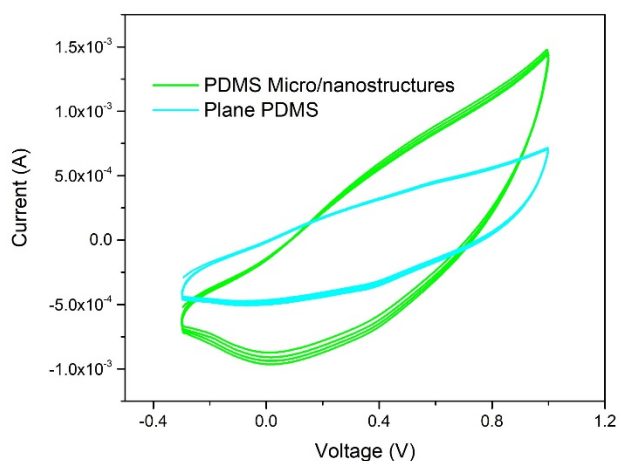

**Figure S1.** CV comparison of the plane PDMS and PDMS micro/nanostructures, which were tested in 0.1mol/L NaOH solution at the scan rate of 100 mV/s.
